# Supplementary material for: Self-catalytic solution–liquid–liquid–solid (SLLS) growth of tapered SnS nanorods
Source: Royal Society of Chemistry journal article supplement (doi:10.1039/c3nr00186e), 2013-01-01
Supplement: c3nr00186e.pdf [file c3nr00186e.pdf]

# Self-catalytic solution-liquid-solid (SLLS) growth of tapered SnS nanorods

**Ki-Hyun Cho and Yun-Mo Sung\***

Department of Materials Science and Engineering, Korea University, Seoul 136-713, South Korea

E-mail: [ymsung@korea.ac.kr](mailto:ymsung@korea.ac.kr)

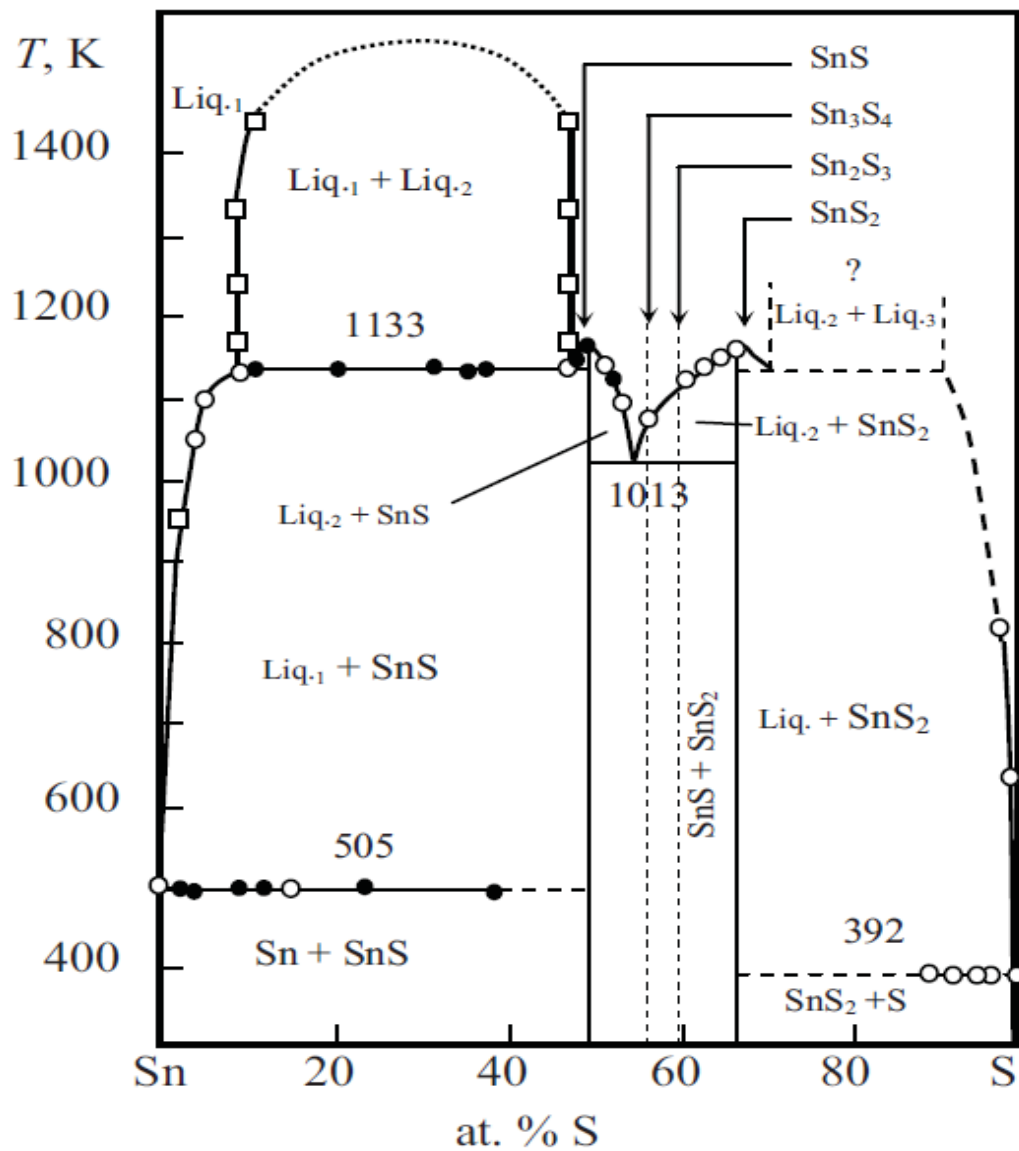

Figure S1. Sn-S binary phase diagram<sup>1</sup>

### Reference

1 W. Albers, C. Haas, H. J. Vink and J. D. Wasscher, *J. Appl. Phys.* 1961, **32**, 45.
